# Supplementary material
Source: bioRxiv or medRxiv preprint supplement (https://www.medrxiv.org/highwire/filestream/76157/field_highwire_adjunct_files/0/2020.04.02.20050674-1.pdf)
Supplement: Supplementary file [file 2020.04.02.20050674-1.pdf]

# Supplementary material

Dynamics of COVID-19 epidemics: SEIR models underestimate peak infection rates and overestimate epidemic duration

Alastair Grant,

School of Environmental Science, University of East Anglia, Norwich, NR4 7TJ, UK

Email: A.Grant@uea.ac.uk

## Matlab code fragments for model of COVID-19

### Based on parameter values from Fang et al. (2020)

Parameters are set as follows:

```
Te=7;Ti=10.25;N0=10000000;K=10;
```

Discrete time SEIR model

Counts in SEI and R are held in vector X, where:

```
X' = [S E I R]
```

Projection matrix calculated:

```
II=X(3)
infect_r=beta0*K*(II/N0) ;
proj=[1-infect_r,0,0,0;
      infect_r,1-1/Te,0,0;
      0,1/Te,1-1/Ti,0;
      0,0,1/Ti,1];
```

Each time step iterates:

```
mat_covid_X;X=proj*X
```

Time explicit SEIR matrix model that tracks time within compartments and thus correctly recreates compartment residence time distributions

Age specific counts are held in vector

```
X2' = [S E1 E2 E3 E4 E5 E6 E7 I1 I2 I3 I4 I5 I6 I7 I8 I9 I10 I11 R]
```

Projection matrix calculated:

```
%X contains summed numbers in SEIR categories
II=X(3)
infect_r=beta0*K*(II/N0);

proj2=[1-infect_r,0,0,0,0,0,0,0,0,0,0,0,0,0,0,0,0,0,0,0;
infect_r,0,0,0,0,0,0,0,0,0,0,0,0,0,0,0,0,0,0,0;
0,1,0,0,0,0,0,0,0,0,0,0,0,0,0,0,0,0,0,0;
0,0,1,0,0,0,0,0,0,0,0,0,0,0,0,0,0,0,0,0;
0,0,0,1,0,0,0,0,0,0,0,0,0,0,0,0,0,0,0,0;
0,0,0,0,1,0,0,0,0,0,0,0,0,0,0,0,0,0,0,0;
0,0,0,0,0,1,0,0,0,0,0,0,0,0,0,0,0,0,0,0;
0,0,0,0,0,0,1,0,0,0,0,0,0,0,0,0,0,0,0,0;
0,0,0,0,0,0,0,1,0,0,0,0,0,0,0,0,0,0,0,0;
0,0,0,0,0,0,0,0,1,0,0,0,0,0,0,0,0,0,0,0;
0,0,0,0,0,0,0,0,0,1,0,0,0,0,0,0,0,0,0,0;
0,0,0,0,0,0,0,0,0,0,1,0,0,0,0,0,0,0,0,0;
0,0,0,0,0,0,0,0,0,0,0,1,0,0,0,0,0,0,0,0;
0,0,0,0,0,0,0,0,0,0,0,0,1,0,0,0,0,0,0,0;
0,0,0,0,0,0,0,0,0,0,0,0,0,1,0,0,0,0,0,0;
0,0,0,0,0,0,0,0,0,0,0,0,0,0,1,0,0,0,0,0;
0,0,0,0,0,0,0,0,0,0,0,0,0,0,0,1,0,0,0,0;
0,0,0,0,0,0,0,0,0,0,0,0,0,0,0,0,0.25,0,0;
0,0,0,0,0,0,0,0,0,0,0,0,0,0,0,0,0.75,1,1];
```

Each time step iterates:

```
X=[X2(1);sum(X2(2:8));sum(X2(9:19));X2(20)];
mat2_covid_final;X2=proj2*X2
```
